# Supplementary material for: Mass cytometry reveals immune signatures associated with cytomegalovirus (CMV) control in recipients of allogeneic haemopoietic stem cell transplant and CMV‐specific T cells
Source: PubMed Central journal article supplement — Clin Transl Immunology. 2020 Jul 2;9(7):e1149. doi: 10.1002/cti2.1149 (PMC7332355; doi:10.1002/cti2.1149), 2020-07-02

## Supplementary Tables

Supplementary table 1: Mass cytometry panel used for immunophenotyping.

| Metal Isotope /Fluorochrome          | Antigen       | Clone     | Manufacturer |
|--------------------------------------|---------------|-----------|--------------|
| Barcoding and fluorescent            |               |           |              |
| <sup>89</sup> Y or <sup>113</sup> In | CD45          | 30-F11    | Biolegend    |
| Biotin                               | CD86          | IT2.2     | BD           |
| PE                                   | CD223 (Lag3)  | T47-530   | BD           |
| Remaining surface stain              |               |           |              |
| <sup>115</sup> In                    | CD11c         | Bu15      | Biolegend    |
| <sup>141</sup> Pr                    | CD27          | M-T271    | BD           |
| <sup>142</sup> Nd                    | CD19          | HIB19     | BD           |
| <sup>143</sup> Nd                    | CD45RA        | HI100     | Biolegend    |
| <sup>144</sup> Nd                    | CCR5          | HEK/1/8   | Biolegend    |
| <sup>145</sup> Nd                    | CD4           | RPA-T4    | BD           |
| <sup>146</sup> Nd                    | CCR10         | 1B5       | BD           |
| <sup>147</sup> Sm                    | CD20          | 2H7       | Biolegend    |
| <sup>148</sup> Nd                    | CD16          | 3G8       | BD           |
| <sup>149</sup> Sm                    | CD366 (Tim3)  | 7D3       | BD           |
| <sup>150</sup> Nd                    | Biotin        | 1D4-C5    | Biolegend    |
| <sup>151</sup> Eu                    | CD278 (ICOS)  | DX29      | BD           |
| <sup>152</sup> Sm                    | CD45RO        | UCHL1     | BD           |
| <sup>153</sup> Eu                    | CD62L         | DREG      | Biolegend    |
| <sup>154</sup> Gd                    | CD196 (CCR6)  | 11A9      | BD           |
| <sup>155</sup> Gd                    | CD31          | WM59      | Biolegend    |
| <sup>156</sup> Gd                    | PE            | PE00<br>1 | Biolegend    |
| <sup>158</sup> Gd                    | CD194 (CCR4)  | L291H4    | Biolegend    |
| <sup>159</sup> Tb                    | CD197 (CCR7)  | 150503    | RnD Systems  |
| <sup>160</sup> Gd                    | CD14          | M5E2      | Biolegend    |
| <sup>161</sup> Dy                    | CD274 (PD-L1) | 29E.2A3   | Biolegend    |
| <sup>163</sup> Dy                    | CD183 (CXCR3) | G025H7    | Biolegend    |
| <sup>164</sup> Er                    | CD161         | DX12      | BD           |
| <sup>165</sup> Ho                    | CD127 (IL-7R) | A019D5    | Biolegend    |
| <sup>166</sup> Er                    | CD185 (CXCR5) | RF8B2     | BD           |
| <sup>167</sup> Er                    | CD38          | HIT2      | Biolegend    |
| <sup>168</sup> Er                    | CD8a          | RPA-T8    | BD           |
| <sup>169</sup> Tm                    | CD25          | 2A3       | Fluidigm     |
| <sup>170</sup> Er                    | CD3           | UCHT1     | BD           |

|                     |                    |          |           |
|---------------------|--------------------|----------|-----------|
| 171Yb               | CD335 (NKp46)      | 9E2      | Biolegend |
| 172Yb               | CD57               | HCD57    | Fluidigm  |
| 173Yb               | Integrin $\beta$ 7 | FIB504   | BD        |
| 174Yb               | HLA-DR             | L243     | BD        |
| 175Lu               | CD279 (PD-1)       | EH12.2H7 | Biolegend |
| 176Lu               | CD56               | NCAM16   | BD        |
| Intracellular stain |                    |          |           |
| 162Er               | FOXP3              | PCH101   | BD        |
| 191/193Ir           | DNA Intercalator   |          | Fluidigm  |

\

## Supplementary Figures

**Supplementary figure 1.** Gating Strategy. PBMCs were stained as per antibodies and steps outlined in Supplementary table S1 and subsequently analysed by mass cytometry. **A)** Cells were pre-gated prior to population analysis. Cells were first distinguished as positive for DNA-intercalated events (detected in channels 191 and 193) and negative for EQ-beads (detected in 140 channel), and with subsequent demarcation for exclusion of dead (cisplatin positive) cells and differential CD45 antibody staining to distinguish barcoded, concurrently analysed samples. **B)** The gating strategy allows for distinguishing major immune lineages and particular subsets of interest following haemopoietic stem cell transplantation immune reconstitution. **C)** Summarising the collective gated population occupancy as demarcated by populations in second row of Supplementary figure 1B (boxed in grey), with median frequency  $\pm$  sem across a batch of healthy controls ( $n = 4$ ) and patients receiving HSCT alone ( $n = 10$ ).

**Supplementary figure 2.** The mass cytometry immunophenotyping assay is robust across experimental batches. **A)** Correlation showing consistency of population frequencies for the 6 healthy control (HC) samples analysed across two different batches, with HC4 analysed in three independent batches. Colour identifies healthy control correlated across the frequency of major immune populations (Supplementary figure 1B, row 2). Linear regression line is shown in black with the 95% confidence intervals shaded. Coefficient,  $P$ -value and slope was calculated on data from all healthy control batch comparisons. t-SNE shows good mixing of batches across clusters when analysed for **B)** scaled populations or **C)** frequencies of parental gates.

**Supplementary figure 3.** Density plot, CD3, CD4, CD8, CD19, CD56, HLA-DR and CD16 intensity of signal are shown across viSNE space occupancy from a time series of Patient 1 and Patient 2 who had divergent clinical outcomes following VST treatment. Day post-transplant annotated on Figure, with day post-VST infusion in brackets.

# Supplementary figure 1

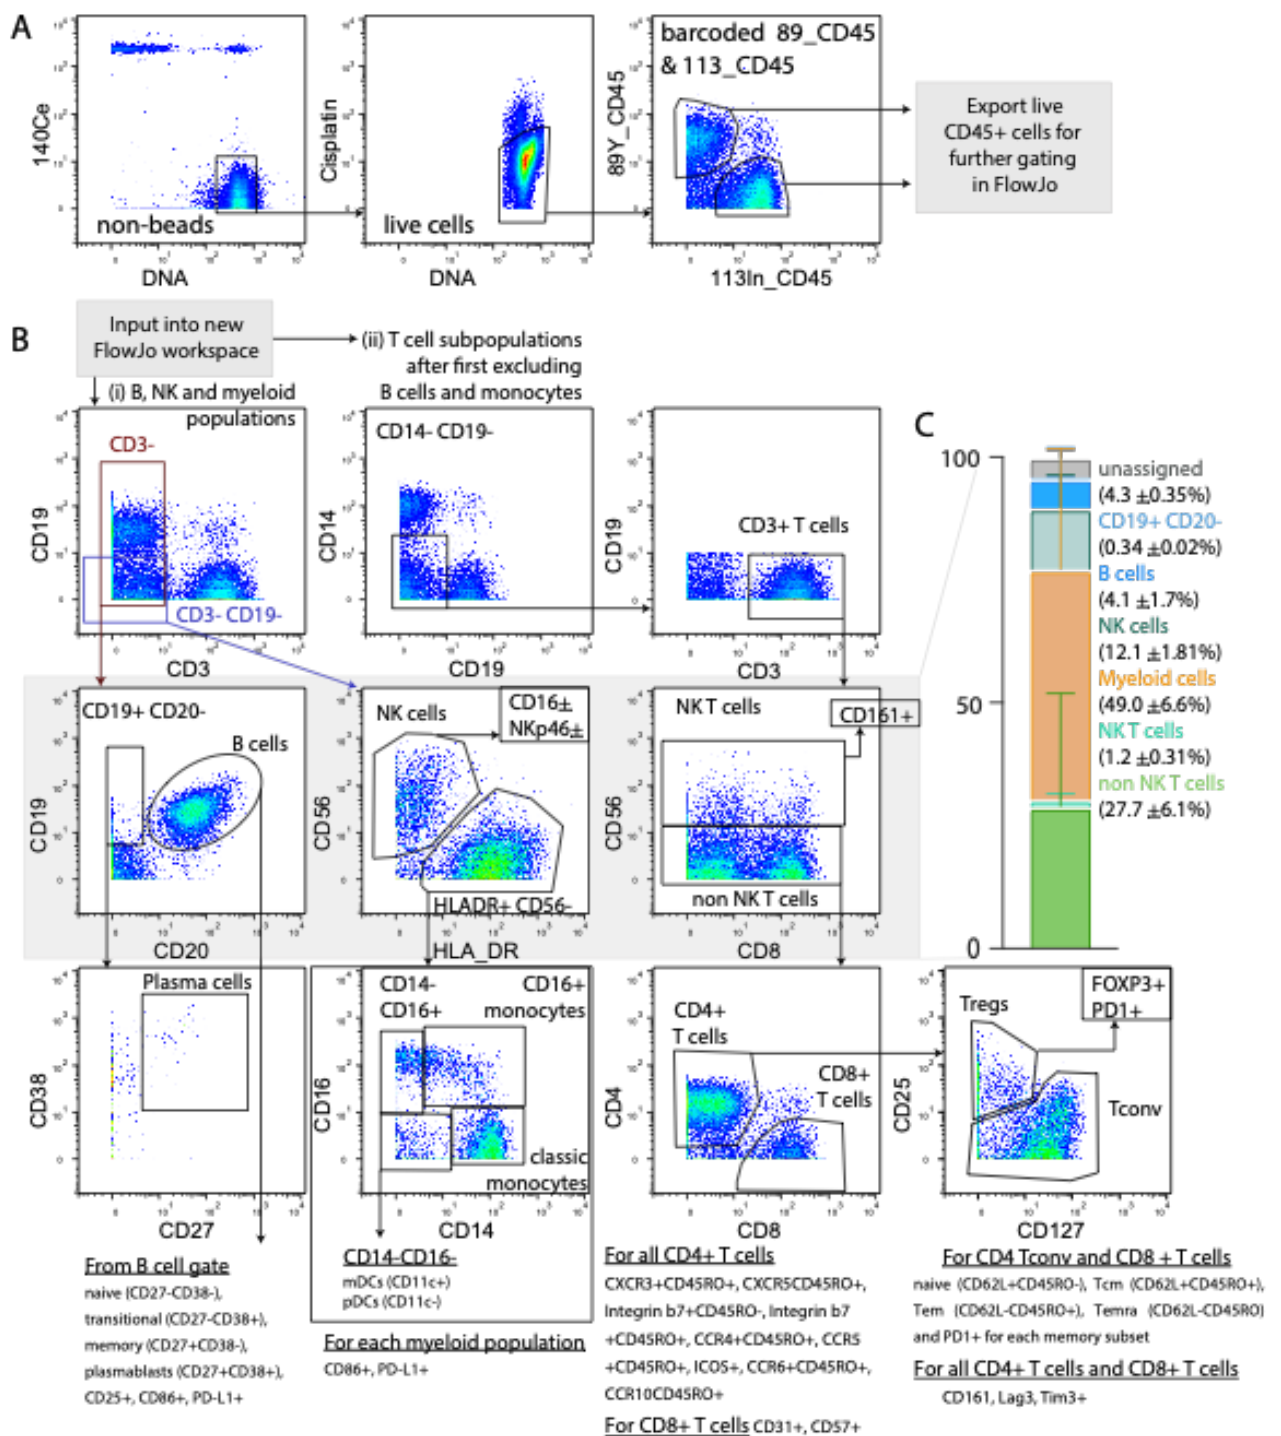

## Supplementary figure 2

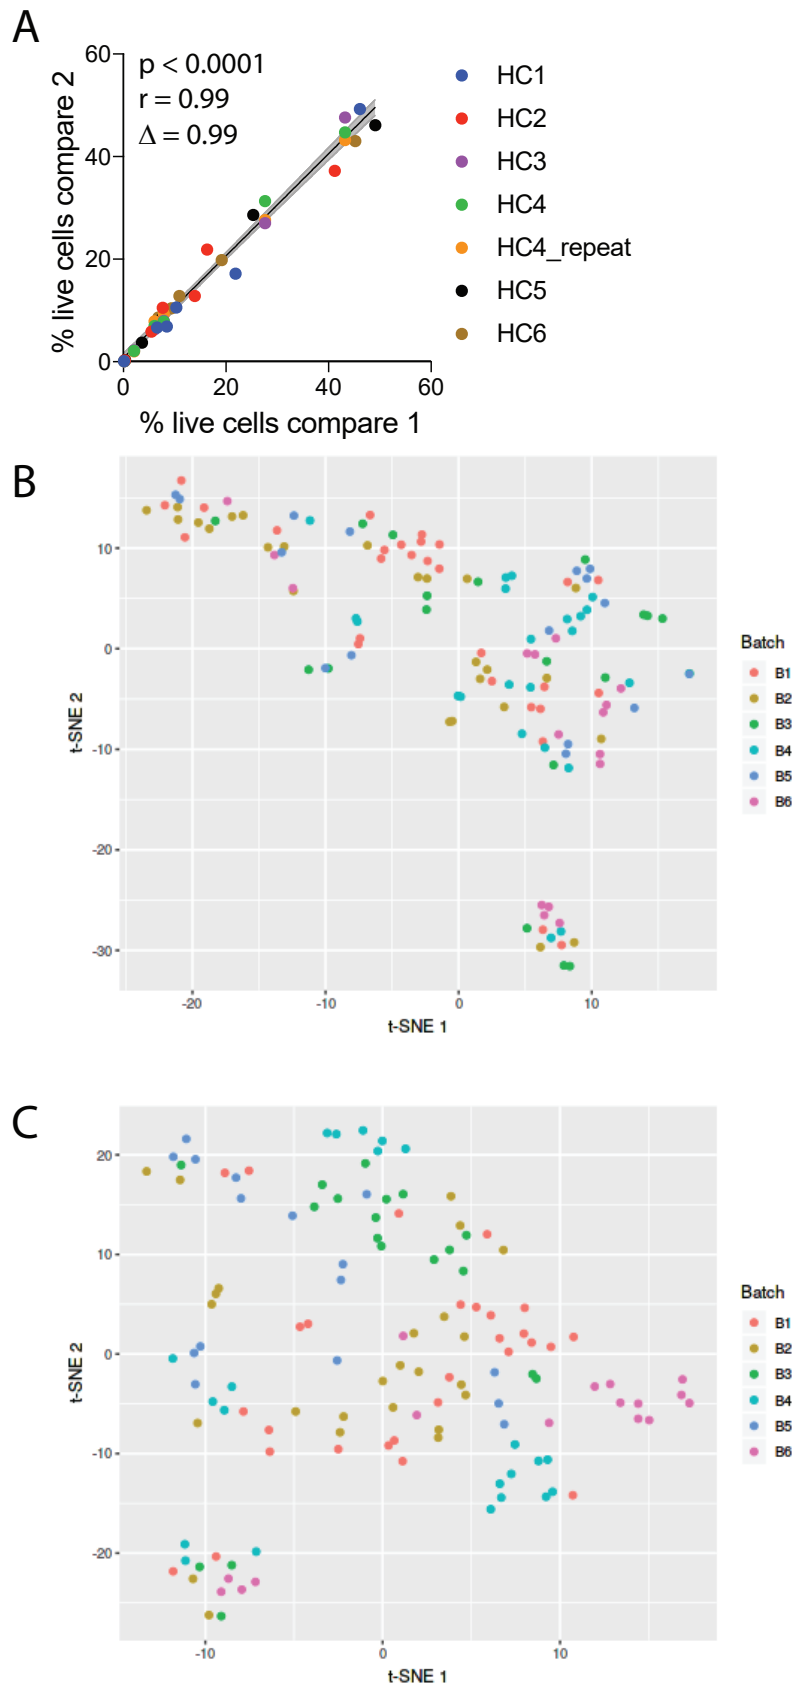

### Supplementary figure 3

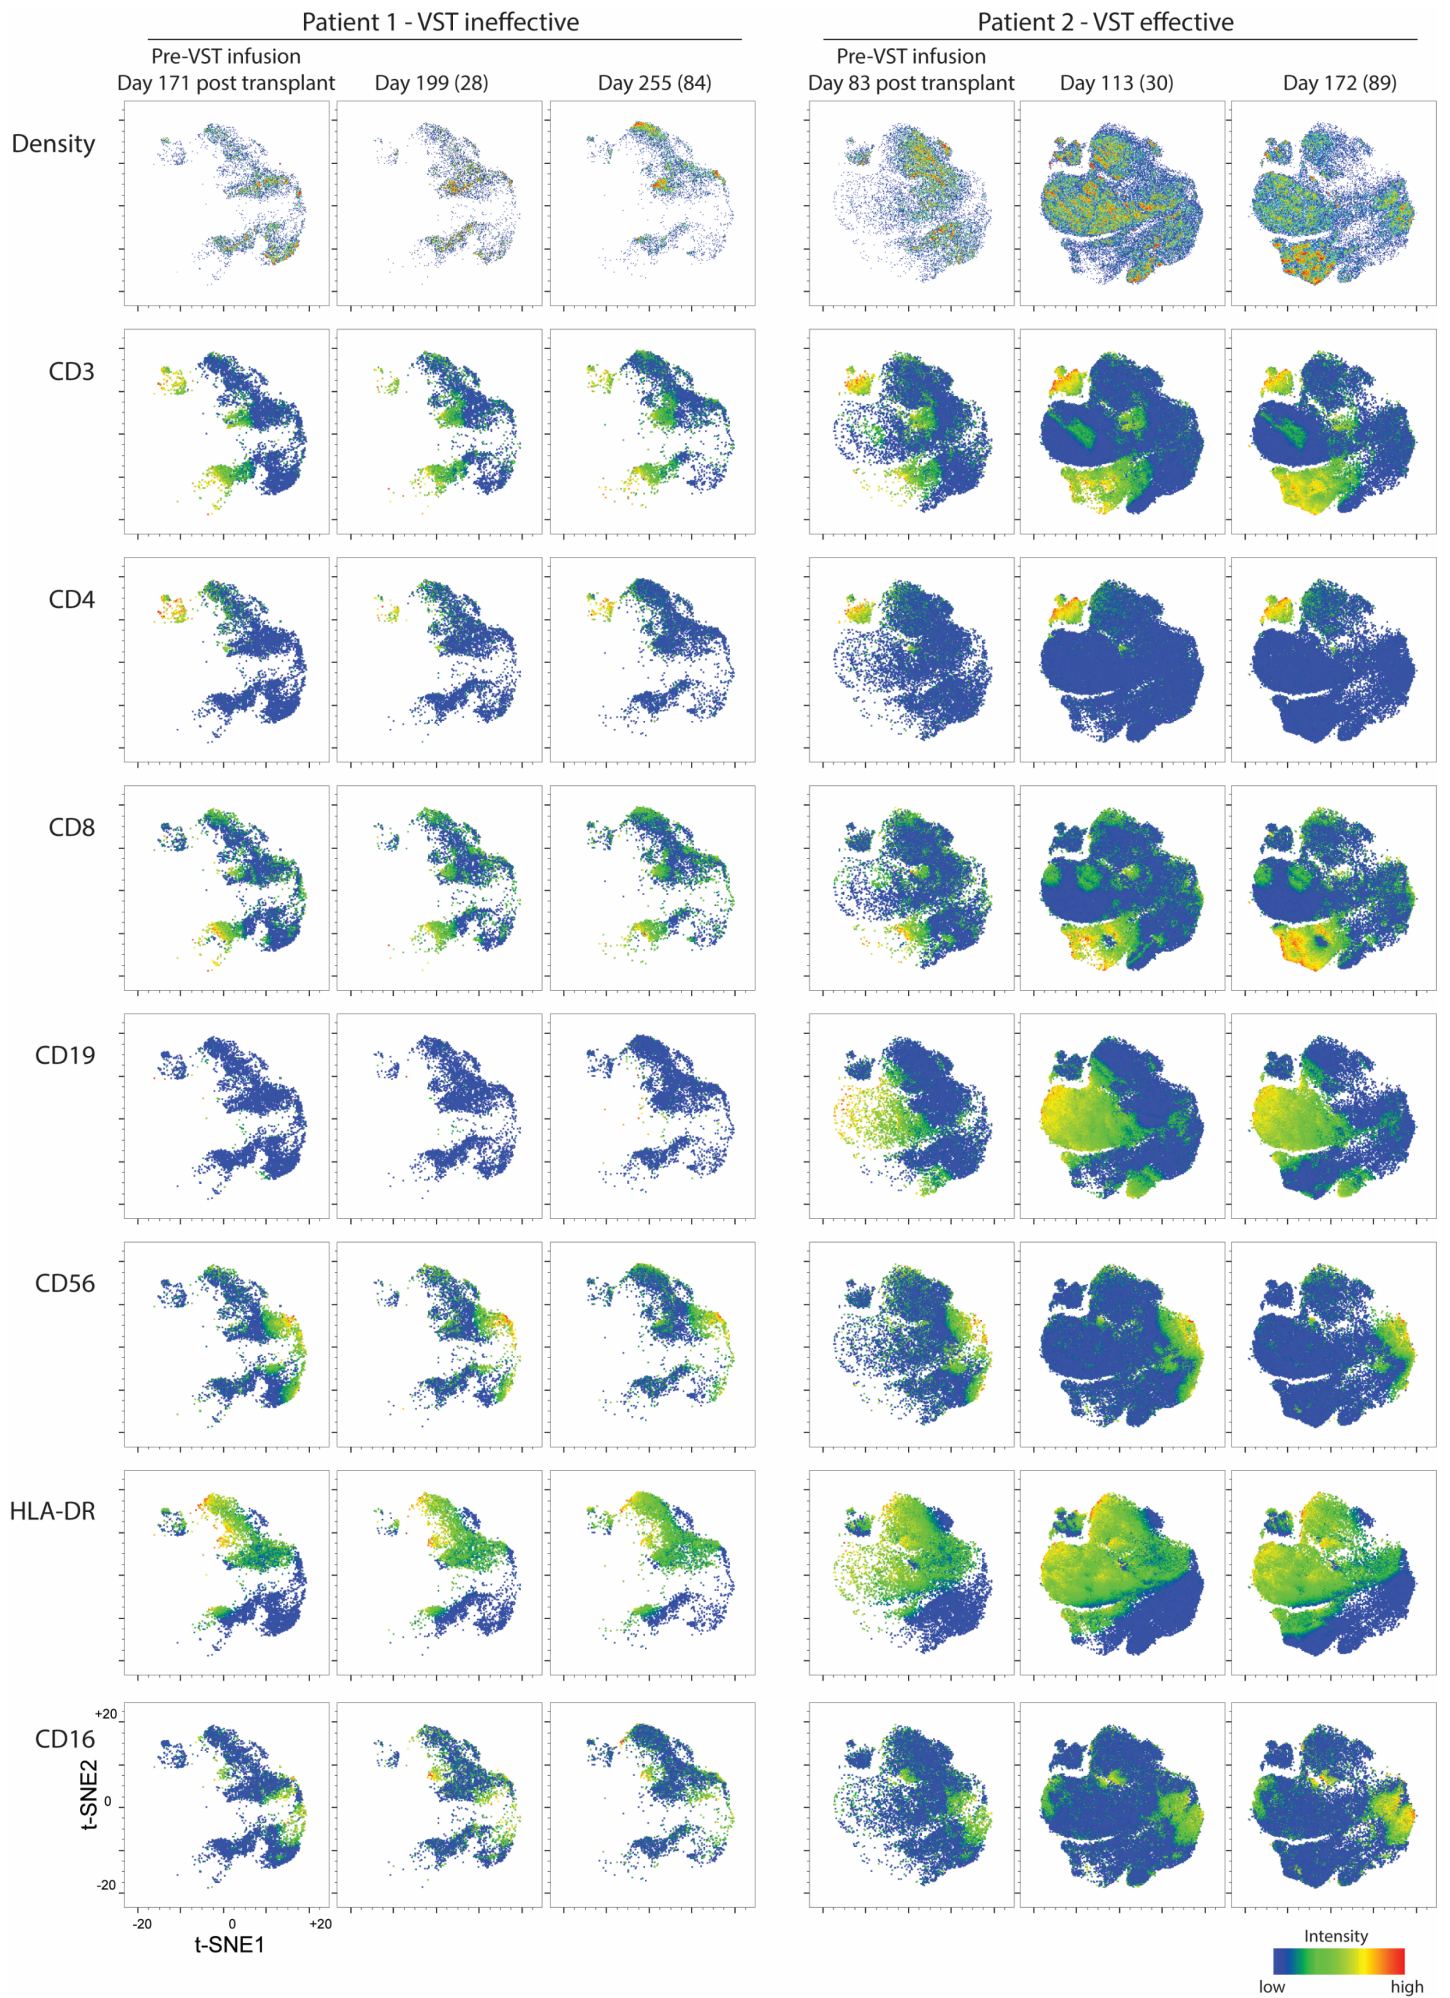

Supplement: CTI2-9-e1149-s001.pdf [file CTI2-9-e1149-s001.pdf]
